# Supplementary material for: Decrease of heart rate variability during exercise: an index of cardiorespiratory fitness
Source: bioRxiv or medRxiv preprint supplement (doi:10.1101/2021.09.23.21263943), 2022-04-22
Supplement: Supplementary file [file media-1.pdf]

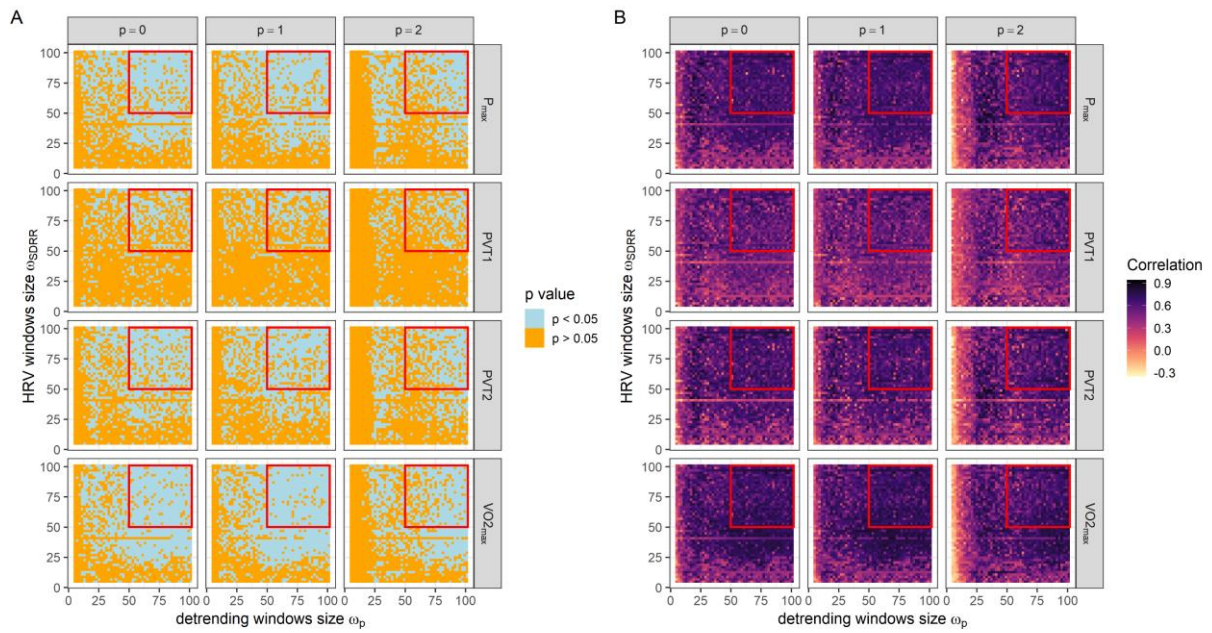

Figure S1. p value (panel A) and Spearman correlation coefficient (panel B) between the HRV decay rate  $a$  and cardiorespiratory parameters ( $P_{max}$ , PVT1, PVT2,  $VO2_{max}$ ), using a 0th ( $p=0$ ), first ( $p=1$ ) or second ( $p=2$ ) order polynomial detrending. Each pixel corresponding to 1 of the 49 size of detrending window  $\omega_p=1,3,5,\dots,101$  and 49 sizes of SDRR calculation window  $\omega_{RR}=1,3,5,\dots,101$ . Red squares delimit the regions for which we observe significance below 0.05 (A) and a high correlation (B).
